# Supplementary material for: Does using comprehensive preoperative bowel preparation offer any advantage for urinary diversion using ileum? A meta-analysis
Source: Springer Nature journal article supplement (doi:10.1007/s11255-012-0319-5), 2012-11-16
Supplement: MOESM1 [file 11255_2012_319_MOESM1_ESM.doc]

**Supplementary Figures**

A.

B

C.

D.

E.

F.

**Figure 1.** Forest plots illustrating Ileus (A), Sepsis (B), Anastomosis leakage (C), Wound dehiscence(D), Peritonitis(E) and Fistula(F) in patients with limited BP and comprehensive BP.
